# Supplementary material for: Growth of SnO2 nanowire arrays by ultrasonic spray pyrolysis and their gas sensing performance
Source: Royal Society of Chemistry journal article supplement (doi:10.1039/c4ra05682e), 2014-01-01
Supplement: c4ra05682e1.pdf [file c4ra05682e1.pdf]

**Supplementary Materials for**  
**Growth of SnO<sub>2</sub> nanowire arrays by ultrasonic spray**  
**pyrolysis and their gas sensing performance**

*Jianbo Sun<sup>1</sup>, Peng Sun<sup>2</sup>, Dalin Zhang<sup>2</sup>, Jing Xu<sup>2</sup>, Xishuang Liang<sup>2</sup>, Fengmin Liu<sup>2\*</sup>,*

*Geyu Lu<sup>2\*</sup>*

1. Key Laboratory for Photonic and Electronic Bandgap Materials, Ministry of Education, School of Physics and Electronic Engineering, Harbin Normal University, Harbin 150025, P. R. China.

2. State Key Laboratory on Integrated Optoelectronics Jilin University Region; College of Electronic Science and Engineering, Jilin University, 2699 Qianjin Street, Changchun 130012, P. R. China

Corresponding author. Tel.: +86-431-85167808; Fax: +86-431-85167808.

E-mail Address: liufm@jlu.edu.cn

luy@jlu.edu.cn

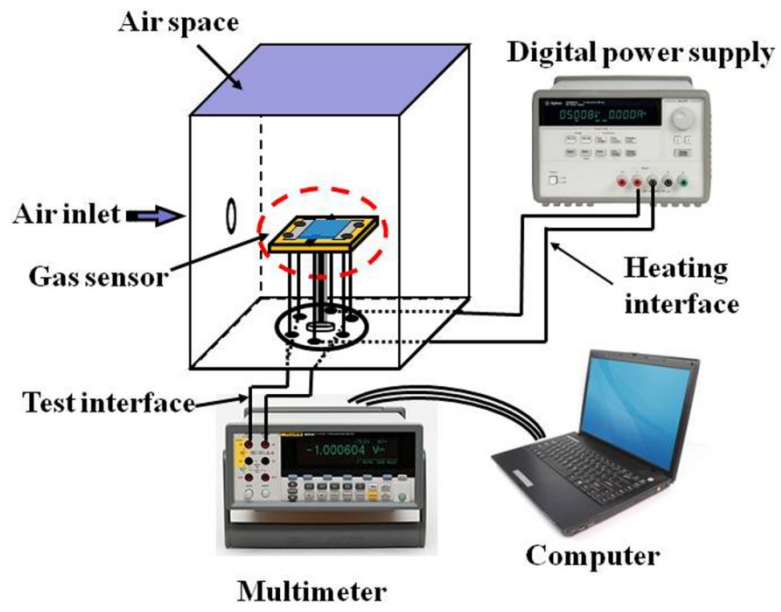

Figure S1. Static gas sensor test system

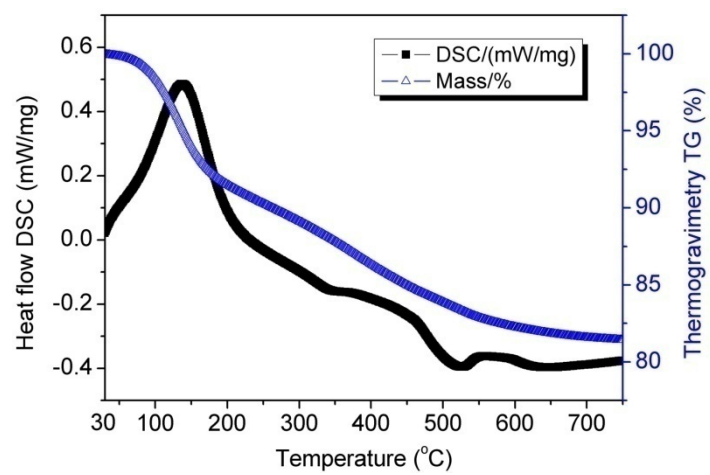

Figure S2 TG–DSC curve of Sn(OH)<sub>4</sub>

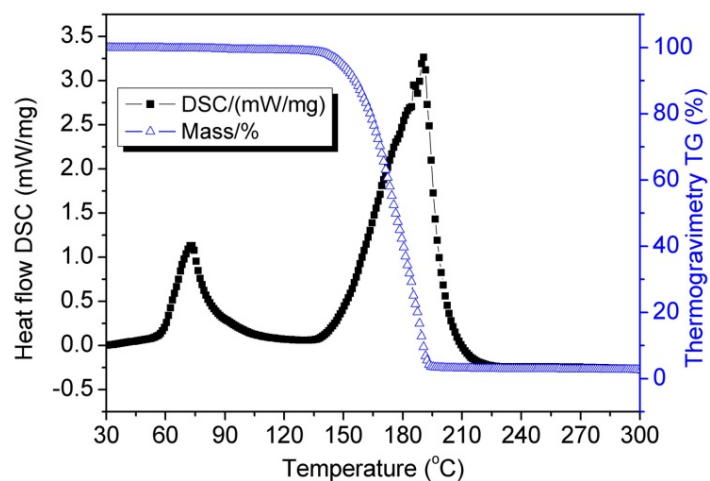

Figure S3 TG–DSC curve of SnCl<sub>4</sub>·5H<sub>2</sub>O.

The relative reaction equation and mass loss were given in the equation (1) and (2).

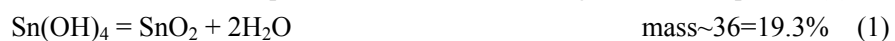

186.7      150.7      18

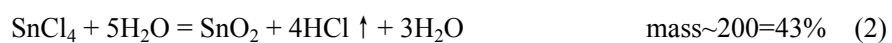

260.5      18      150.7
